# Supplementary material for: An autonomic self-healing organogel with a photo-mediated modulus
Source: Royal Society of Chemistry journal article supplement (doi:10.1039/c6cc08513j), 2016-01-01
Supplement: c6cc08513j1.pdf [file c6cc08513j1.pdf]

## An autonomic self-healing organogel with a photo-mediated modulus

Yubing Xiong,<sup>a,b</sup> Zhijun Chen,<sup>a</sup> Hong Wang,<sup>c</sup> Lisa-Maria Ackermann,<sup>a</sup> Hans-Jürgen Butt,<sup>a</sup> and Si Wu<sup>a\*</sup>

<sup>a</sup> Max Planck Institute for Polymer Research, Ackermannweg 10, Mainz 55128, Germany

<sup>b</sup> Key Laboratory of Eco-Environment-Related Polymer Materials, Ministry of Education; College of Chemistry and Chemical Engineering, Northwest Normal University, Lanzhou 730070, China

<sup>c</sup> Physical Science and Engineering Division, King Abdullah University of Science & Technology (KAUST), Thuwal, 23955-6900, Saudi Arabia

Corresponding author: Dr. S. Wu, email address: [wusi@mpip-mainz.mpg.de](mailto:wusi@mpip-mainz.mpg.de)

## Experimental section

### Materials

4-Phenylazophenol (Aldrich, **95%**), 1-vinylimidazole (Aldrich, 99%), bromoacetonitrile (Aldrich, 97%) and bistrifluoromethanesulfonimide lithium salt (Aldrich, 99%) were used as received without further treatment. 2,2'-Azobis(2-methylpropionitrile) (AIBN, 98%) was recrystallized from methanol before use. Poly(acrylic acid) (PAA,  $M_w = 250 \text{ kg mol}^{-1}$ ) and guanidine hydrochloride were purchased from Sigma Aldrich. 4-(Dimethylamino)pyridine (DMAP) and N-(3-dimethylaminopropyl)-N'-ethylcarbodiimide hydrochloride (EDC) were purchased from Carl Roth. All the solvents (HPLC grade) and other chemicals were purchased from Sigma Aldrich, and were used without further purification. Milli-Q water (resistivity:  $18.2 \text{ M}\Omega\cdot\text{cm}$ ) provided by a Sartorius Arium 611 VF Purification System was used throughout the research.

### Methods

$^1\text{H}$  and  $^{13}\text{C}$  nuclear magnetic resonance (NMR) spectra were recorded on a Bruker Avance 250 MHz spectrometer. Mass spectra (MS) were obtained using a VG instrument ZAB 2-SE-FPD. UV-Vis absorption spectra were measured on a Lambda 900 spectrometer (Perkin Elmer). Photoisomerization was induced by the LEDs with the wavelengths of 365 nm and 530 nm (device types LCS-0365-03-22 and LCS-0530-03-22, Mightex Systems). The output intensities of the LEDs were controlled by an LED controller (device type SLC-MA04-MU, Mightex Systems) and were calibrated by an optical powermeter (Model 407A, Spectra-Physics Corporation). Dynamic rheology measurement was conducted on ARES Rheometer (Rheometric Scientific) equipped with parallel plates (diameters of 8 mm). Frequency dependencies of the storage  $G'$  and the loss  $G''$  parts of the shear modulus were determined from frequency sweeps measured within the frequency range  $10^{-1}$ – $10^2 \text{ rad/s}$  at  $25^\circ\text{C}$ . Isothermal titration calorimetry (ITC) measurement was carried out on a VP-ITC microcalorimeter (Microcal, Inc., Northampton, MA) at  $25^\circ\text{C}$ . The titration was conducted by stepwise injections of 5 mM PIL solution in DMF from a 278  $\mu\text{L}$  injection syringe into the sample cell filled with 1.0 mM PAA-Azo solution in DMF.

### Synthesis

#### Synthesis of poly(3-cyanomethyl-1-vinylimidazolium bis(trifluoromethanesulfonyl)imide) (PCMVImTf<sub>2</sub>N)

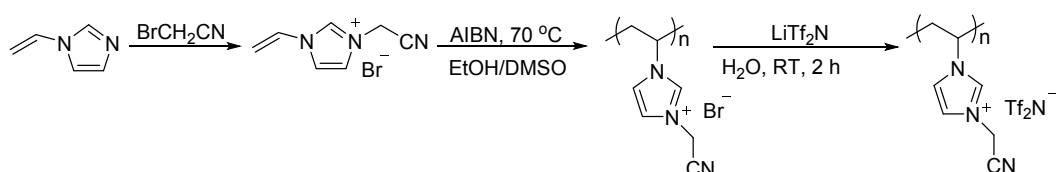

**Scheme S1** Synthesis of PCMVImTf<sub>2</sub>N

Poly(3-cyanomethyl-1-vinylimidazolium bis(trifluoro methanesulfonyl)imide) (PCMVImTf<sub>2</sub>N) was prepared according to the reference.<sup>[1,2]</sup> As illustrated in Scheme S1, 3-cyanomethyl-1-vinylimidazolium bromide ([CMVIm]Br) was firstly prepared by combining of 1-vinylimidazole and bromoacetonitrile in methanol at room temperature for 24 h. [CMVIm]Br was obtained as a gray powder (Yield 95 %). Then, [CMVIm]Br (10.38 g, 50.8 mmol), AIBN (30 mg, 0.183 mmol), and DMF (100 mL) were added into a 250 mL flask. The solution was deoxygenated three times by a freeze-pump-thaw procedure. The flask was then refilled with nitrogen and placed in an oil bath at 70 °C for 24 h. After the reaction was quenched by immersing into liquid nitrogen, the mixture was then exhaustively dialyzed against water for 1 week and freeze-dried from water. Poly(3-cyanomethyl-1-vinylimidazolium bis(trifluoro methanesulfonyl)imide) (PCMVImTf<sub>2</sub>N) was prepared by anion exchange of PCMVImBr with bis(trifluoromethanesulfonyl)imide lithium salts (LiTf<sub>2</sub>N) in H<sub>2</sub>O at room temperature for 2 h. <sup>1</sup>H NMR spectra and gel permeation chromatography (GPC) curves of PCMVImBr are illustrated in Figure S3, and Figure S4, respectively. The apparent molecular weight and PDI value of PCMVImBr was  $5.80 \times 10^5$  g mol<sup>-1</sup> and 3.85, respectively (measured by GPC, eluent: water with a mixture of 80% acetate buffer and 20% methanol). PCMVImTf<sub>2</sub>N was obtained by anion exchange of PCMVImBr with LiTf<sub>2</sub>N salt. Therefore, the apparent molecular weight of the PCMVImTf<sub>2</sub>N is calculated to be  $1.12 \times 10^6$  g mol<sup>-1</sup>.

#### Synthesis of azobenzene-grafted poly(acrylic acid) (PAA-Azo)

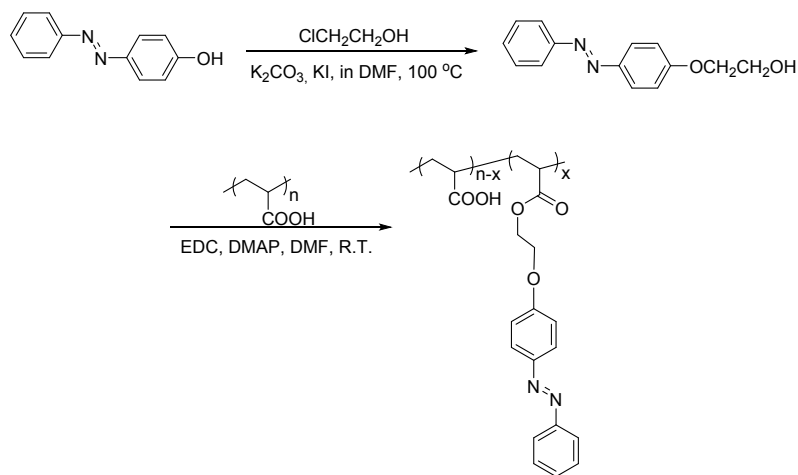

**Scheme S2** Synthesis of azobenzene grafted PAA (PAA-Azo).

Azobenzene-grafted poly(acrylic acid) (PAA-Azo) was prepared according to the reported method.<sup>[3,4]</sup> Firstly, 4-hydroxyethyl azobenzene (HE-AZO) was synthesized and a typical procedure is as follows: 4-phenylazophenol (3.96 g, 20 mmol), 2-chloroethanol (1.61 g, 20 mmol) and K<sub>2</sub>CO<sub>3</sub> (3.76 g, 20 mmol) were dissolved in 100 mL DMF, a pinch of KI was added. The mixed solution was refluxed at 100 °C under a nitrogen atmosphere overnight. After cooling to room temperature, the precipitated potassium chloride was filtered off and the filtrate was evaporated on vacuum. The crude product was purified by column chromatography (methanol : dichloromethane = 1:3, v/v). Yield 3.79 g (78%). <sup>1</sup>H

NMR (250 MHz,  $\text{CDCl}_3$ ):  $\delta$  = 7.88–8.0 (d, 4H), 7.42–7.58 (d, 3 H), 7.02–7.12 (m, 2H), 4.21 (t, 2H), 4.04(t, 2H), 1.95(s, 1H).  $^{13}\text{C}$  NMR (100 MHz,  $\text{CDCl}_3$ ): 160.99, 152.58, 147.16, 130.48, 129.00, 124.80, 122.57, 114.75, 69.45, 61.40.

Azobenzene-grafted PAA was prepared from PAA and 4-hydroxyethyl azobenzene in the presence of EDC according to a reported procedure.<sup>[4]</sup> The following protocol is representative of all PAA-Azo syntheses. PAA (0.36 g, 5 mmol accounted by  $\text{CH}_2\text{CHCOOH}$  units, MW 250 kg mol<sup>-1</sup>) were dissolved in DMF (150 mL) at 60 °C for 24 h. HE-AZO (0.72 g, 1.5 mmol) and DMAP (0.035 g, 20% accounted by EDC) were added into PAA DMF solution. After a solution was obtained, EDC (0.43 g, 2.25 mmol) was added, and the mixture was stirred at R.T. for 48 h. The product was purified by dialysis using a dialysis tube (cut-off molecular weight: 7000) against methanol/water (3:1, v/v) for 48 h. Then, the solution after dialysis was evaporated on vacuum. The grafting degree of azobenzene was determined by  $^1\text{H}$ -NMR spectroscopy. Yield 0.68 g (63.0%).  $^1\text{H}$ -NMR (250 MHz,  $d^6$ -DMSO):  $\delta$  = 7.73–7.91 (b, Ar-H), 7.43–7.60 (b, Ar-H), 7.01–7.21 (m, Ar-H), 4.29 (t, 2H), 3.52(t), 2.21(s, 1H), 1.73(t, 2H), 1.49(t, 2H).  $^{13}\text{C}$  NMR (100 MHz,  $d^6$ -DMSO): 162.36, 151.84, 146.05, 130.72, 129.14, 124.49, 122.08, 114.94, 68.92, 62.48.

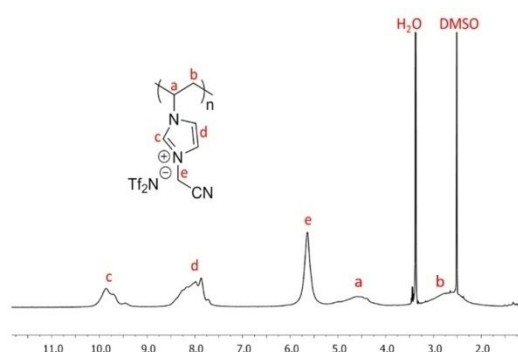

**Figure S1**  $^1\text{H}$ -NMR spectra of PCMVImTf<sub>2</sub>N in DMSO- $d^6$

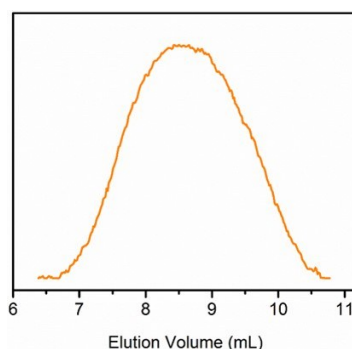

**Figure S2** GPC trace for PCMVImBr (eluent: water with a mixture of 80% acetate buffer and 20% methanol).

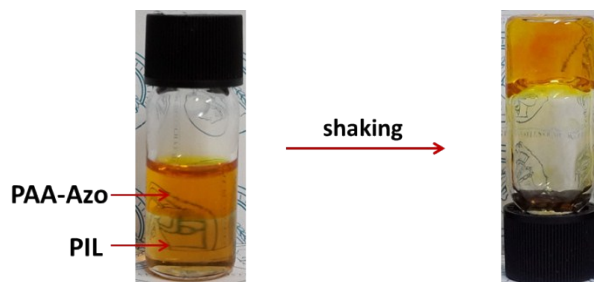

**Figure S3** Photographs of PIL and PAA-Azo in DMF before and after shaking.

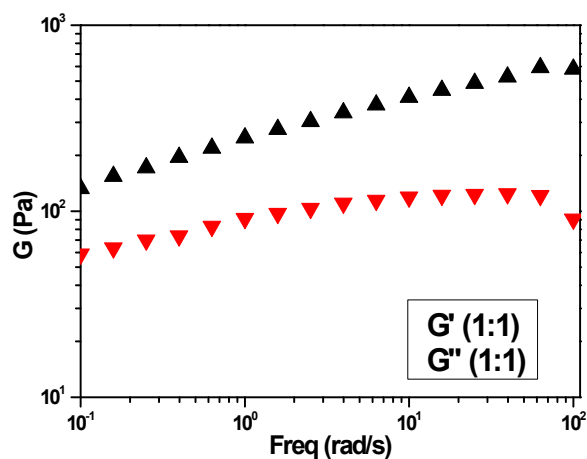

**Figure S4** Rheological properties of 10 wt% PIL@PAA-Azo organogel with PIL to PAA-Azo of 1:1 (w/w) at 25 °C (storage modulus  $G'$  and loss modulus  $G''$  as a function of frequency).

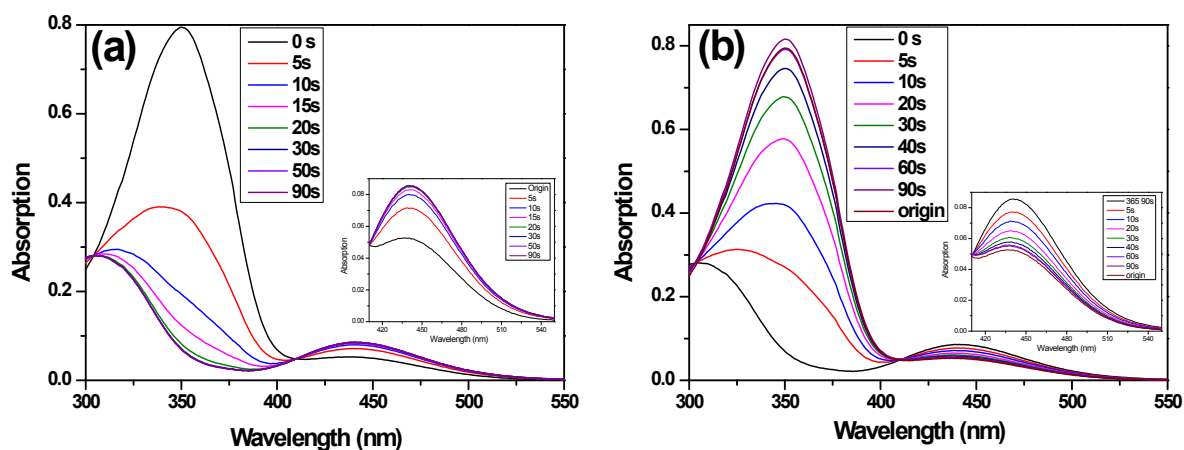

**Figure S5** UV-Vis absorption spectra of PAA-Azo ( $0.03 \text{ mg mL}^{-1}$  in DMSO). (a) Irradiated by 365 nm UV light (365 nm) and (b) irradiated by green light (530 nm).

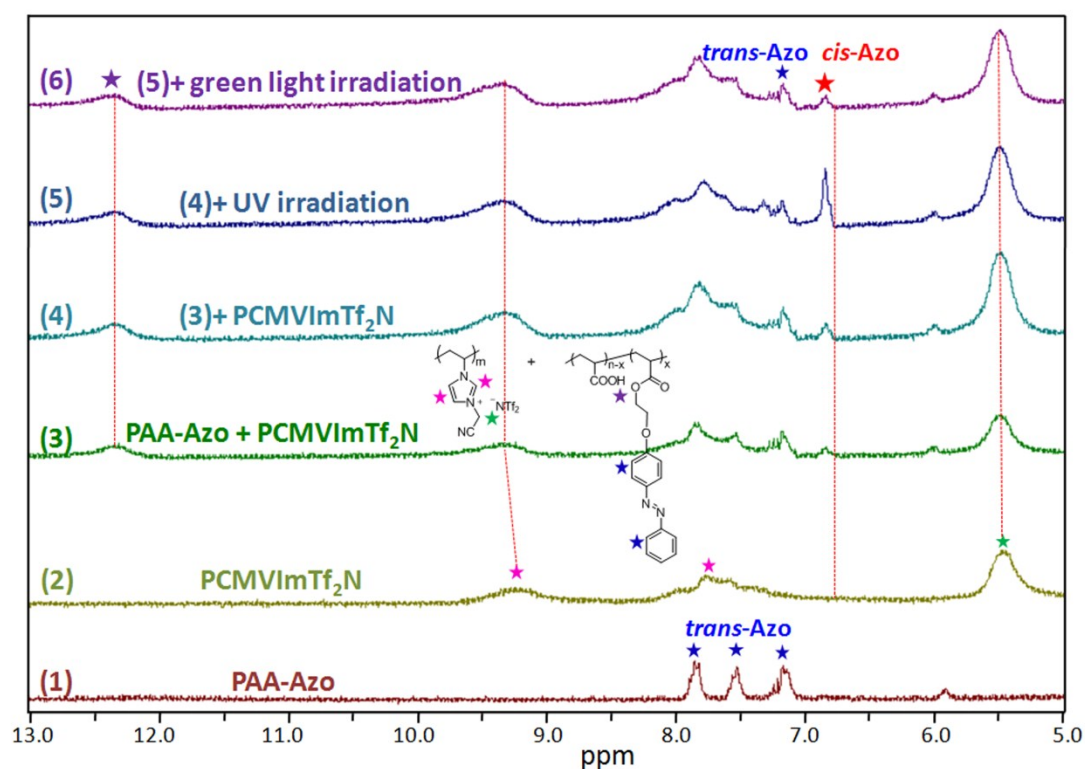

**Figure S6** Partial  $^1\text{H}$  NMR spectra (250 MHz, 0.5 mL  $d^6$ -DMSO, 25  $^\circ\text{C}$ ) of PAA-Azo and PIL.

### Legends to the Supplementary Movies

Video 1. Self-healing behavior of PIL@PAA-Azo organogel after damage under stretching.

Video 2. Stretchable behavior of PIL@PAA-Azo organogel.

Video 3. PIL@PAA-Azo organogel after Gdn-HCl treatment.

### Reference

1. Q. Zhao, P. Zhang, M. Antonietti, J. Yuan, *J. Am. Chem. Soc.* **2012**, *134*, 11852
2. J. Yuan, C. Giordano, M. Antonietti, *Chem. Mater.*, **2010**, *22*, 5003.
3. Y. L. Zhao, J. F. Stoddart, *Langmuir*, **2009**, *25*, 8442.
4. I. Iliopoulos, R. Audebert, *Polym. Bull.*, **1988**, *20*, 577.
